# Supplementary material for: Anti-HIV, antitumor and immunomodulatory activities of paclitaxel from fermentation broth using molecular imprinting technique
Source: AMB Express. 2019 Dec 3;9:194. doi: 10.1186/s13568-019-0915-1 (PMC6890922; doi:10.1186/s13568-019-0915-1)
Supplement: Supplementary file 1 — Additional file 1: Table S1. Primers for real-time quantitative PCR. Table S2. Systems for real-time quantitative PCR. [file 13568_2019_915_MOESM1_ESM.docx]

**Additional file.**

“Anti-HIV, Antitumor and Immunomodulatory Activities of Paclitaxel from Fermentation Broth Using Molecular Imprinting Technique”

“Anti-HIV, Antitumor and Immunomodulatory Activities of Paclitaxel from Fermentation Broth Using Molecular Imprinting Technique”

Junhyok Ryang a 1, Yan Yan a 1, Yangyang Song, Fang Liu a *and Tzi Bun Ngb*

a Department of Microbiology, The Key Laboratory of Molecular Microbiology and Technology, Ministry of Education, Nankai University, Tianjin, 300071, China

bSchool of Biomedical Sciences, Faculty of Medicine, The Chinese University of Hong Kong, Shatin, New Territories, Hong Kong, China

*Corresponding author: liufang312@nankai.edu.cn, Phone +86 22-23509491, Fax 52+(444) 8262372

[b021770@mailserv.cuhk.edu.hk](mailto:b021770@mailserv.cuhk.edu.hk), Phone+852 2096872, Fax +852 26035123

Table S1 Primers for real-time quantitative PCR

| Gene | Primers | | Products |
| --- | --- | --- | --- |
| IL-2 | upstream: | 5’-TGAACTTGGACCTCTGCG-3’ | 220bp |
| downstream: | 5’-AGGGCTTGTTGAGATGATGC-3’ |
| IL-4 | upstream: | 5’-TCCTGCTCTTCTTTCTCG-3’ | 537bp |
| downstream: | 5’-ATGCTCTTTAGGCTTTCC-3’ |
| IL-6 | upstream: | 5’-TTCTTGGGACTGATGCTG-3’ | 380bp |
| downstream: | 5’-CTGGCTTTGTCTTTCTTGTT-3’ |
| IL-10 | upstream: | 5’-ACCAAAGCCACAAAGCAG-3’ | 249bp |
| downstream: | 5’-GGAGTCGGTTAGCAGTATG-3’ |
| IFN-γ | upstream: | 5’-TGAGACAATGAACGCTAC-3’ | 142bp |
| downstream: | 5’-TTCCACATCTATGCCACT-3’ |
| TNF-α | upstream: | 5’-CTGTGAAGGGAATGGGTGTT-3’ | 384bp |
| downstream: | 5’-CAGGGAAGAATCTGGAAAGGTC-3’ |
| GAPDH | upstream: | 5’-TCAACGGCACAGTCAAGG-3’ | 470bp |
| downstream: | 5’-ACCAGTGGATGCAGGGAT-3’ |

Table S2 Systems for real-time quantitative PCR

| composition | volume |
| --- | --- |
| cDNA | 2.0 μL |
| Up primer | 0.8 μL |
| Down primer | 0.8 μL |
| ROX Reference Dye | 0.4 μL |
| SYBR Premix Ex Taq Ⅱ(2×) | 10.0 μL |
| ddH2O | 6.0 μL |
